# Supplementary material
Source: PubMed Central journal article supplement (PMC2669390)
Supplement: 0810076106_0810076106SI.pdf [file 0810076106_0810076106SI.pdf]

# Supporting Information

Rhemtulla et al. 10.1073/pnas.0810076106

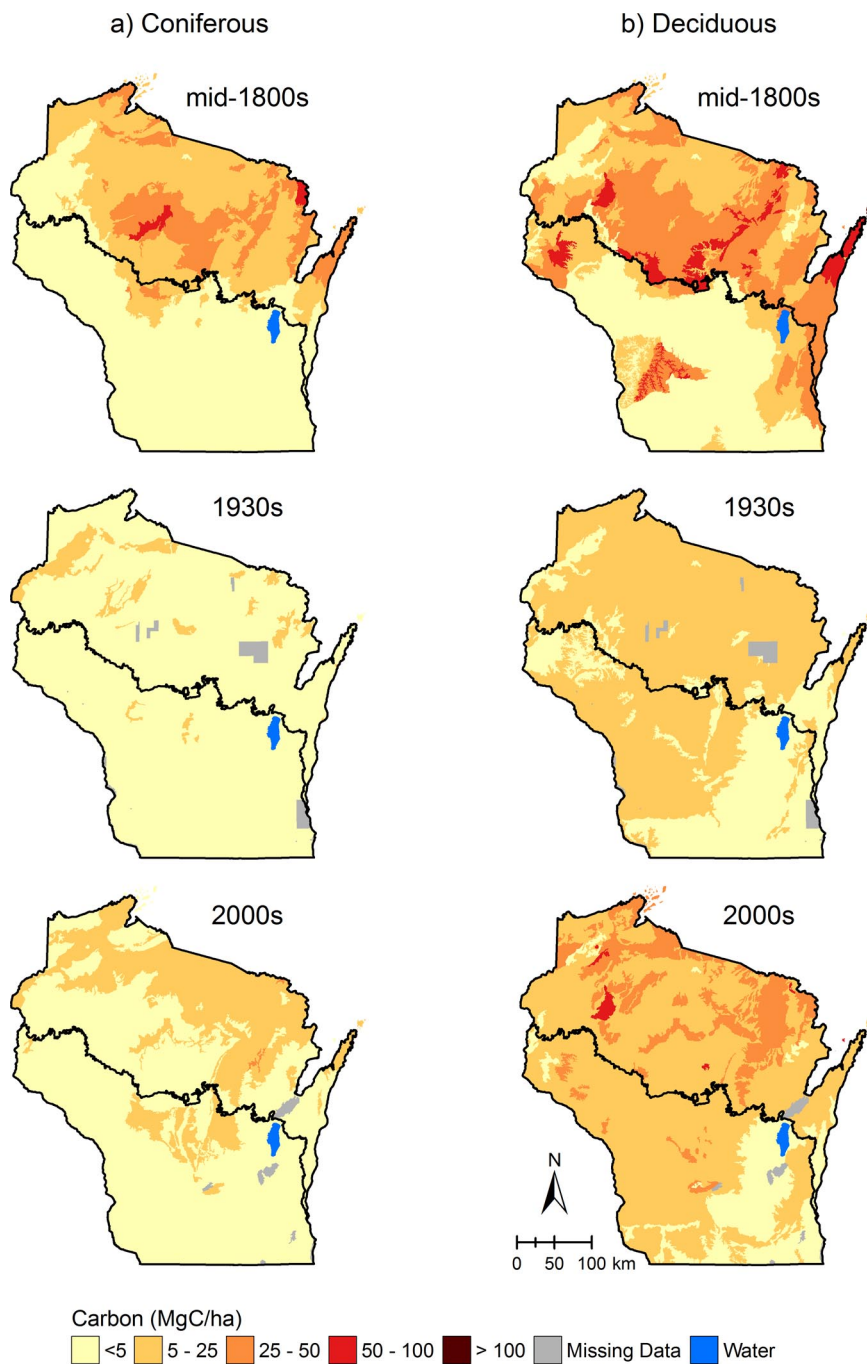

**Fig. S1.** Above-ground live forest carbon (MgC/ha) by forest type for coniferous (a), and deciduous (b) forest in the mid-1800s, 1930s, and 2000s. Data are medians calculated from Monte Carlo simulation results.

**Table S1. Scenarios used in Monte Carlo simulation runs to estimate uncertainty because of biases in Public Land Survey (mid-1800s) dataset**

|                                   | Stand Variables | Allometric Equations |        | Lower bound, TgC | Median, TgC | Upper bound, TgC |
|-----------------------------------|-----------------|----------------------|--------|------------------|-------------|------------------|
|                                   |                 | Shape                | Volume |                  |             |                  |
| Baseline                          | weibull/exp*    | V                    | V      | 434              | 435         | 435              |
| Other Scenarios                   |                 |                      |        |                  |             |                  |
| Weibull diameter distribution     | all weibull     | V                    | V      | 364              | 365         | 365              |
| Exponential diameter distribution | all exponential | V                    | V      | 460              | 460         | 461              |
| Volume constant (no SE)           | weibull/exp*    | C                    | V      | 419              | 420         | 420              |
| Height constant (no SE)           | weibull/exp*    | V                    | C      | 434              | 434         | 435              |

Table shows above-ground live forest carbon estimate for each scenario. Baseline scenario shows the most reasonable values for each model parameter. Lower bound is the 2.5th percentile and upper bound is the 97.5th percentile of all simulation runs within a scenario. V, variable (i.e. coefficients of the allometric equations were modeled as a probability distribution function based on the standard error of the coefficient estimate); C, constant.

\*Tree diameter distributions are modeled as a weibull distribution in survey sections dominated by shade-intolerant species (pines, aspen, paper birch, oak, and hickory) and as an exponential distribution elsewhere.

**Table S2. Scenarios used in Monte Carlo simulation runs to estimate uncertainty because of biases in Wisconsin Land Economic Inventory (1930s) dataset**

|                            | Stand Variables |       |       |          | Allometric Equations |        | Lower bound, TgC | Median, TgC | Upper bound, TgC |
|----------------------------|-----------------|-------|-------|----------|----------------------|--------|------------------|-------------|------------------|
|                            | Mean DBH        | SD, % | Shape | Stocking | Volume               | Height |                  |             |                  |
| Baseline                   | V               | 80    | E/U   | V        | V                    | V      | 120              | 120         | 120              |
| Other Scenarios            |                 |       |       |          |                      |        |                  |             |                  |
| Midpoint of size class     | C               | 80    | E/U   | V        | V                    | V      | 136              | 136         | 137              |
| SD $\geq$ 99%              | V               | 99    | E/U   | V        | V                    | V      | 109              | 109         | 109              |
| SD $\geq$ 66%              | V               | 66    | E/U   | V        | V                    | V      | 131              | 131         | 132              |
| Midpoint of stocking class | V               | 80    | E/U   | C        | V                    | V      | 120              | 120         | 120              |
| Volume constant (no SE)    | V               | 80    | E/U   | V        | C                    | V      | 117              | 118         | 118              |
| Height constant (no SE)    | V               | 80    | E/U   | V        | V                    | C      | 120              | 120         | 120              |

Table shows above-ground live forest carbon estimate for each scenario. Baseline scenario shows the most reasonable values for each model parameter. Lower bound is the 2.5th percentile and upper bound is the 97.5th percentile of all simulation runs within a scenario. DBH, diameter at breast height; V, variable (see Table S1 for details); C, constant; E, even-aged (Weibull distribution); U, uneven-aged (exponential distribution).

**Table S3. Scenarios used in Monte Carlo simulation runs to estimate uncertainty because of biases in the U.S. Forest Service Forest Inventory and Analysis (2000s) dataset**

|                         | Allometric Equations |        | Lower bound, TgC | Median, TgC | Upper bound, TgC |
|-------------------------|----------------------|--------|------------------|-------------|------------------|
|                         | Volume               | Height |                  |             |                  |
| Baseline                | V                    | V      | 275              | 276         | 277              |
| Other Scenarios         |                      |        |                  |             |                  |
| Volume constant (no SE) | C                    | V      | 276              | 276         | 276              |
| Height constant (no SE) | V                    | C      | 275              | 276         | 277              |

Table shows above-ground live forest carbon estimate for each scenario. Baseline scenario shows the most reasonable values for each model parameter. Lower bound is the 2.5th percentile and upper bound is the 97.5th percentile of all simulation runs within a scenario. V, variable (see [Table S1](#) for details); C, constant.
